# Supplementary material
Source: MDPI journal article supplement (https://www.mdpi.com/2504-5377/5/2/20)
Supplement: s1 [file s1]

## Supporting Material

### Conductive nanofilms with oppositely charged reduced graphene oxides as a base for electroactive coatings and sensors

Tomasz Kruk, Piotr Warszyński

A)

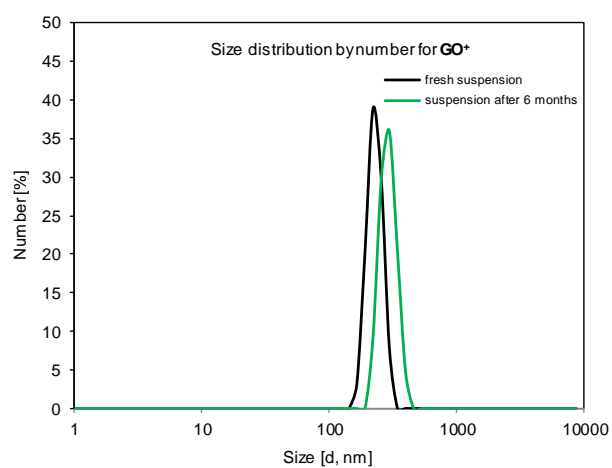

B)

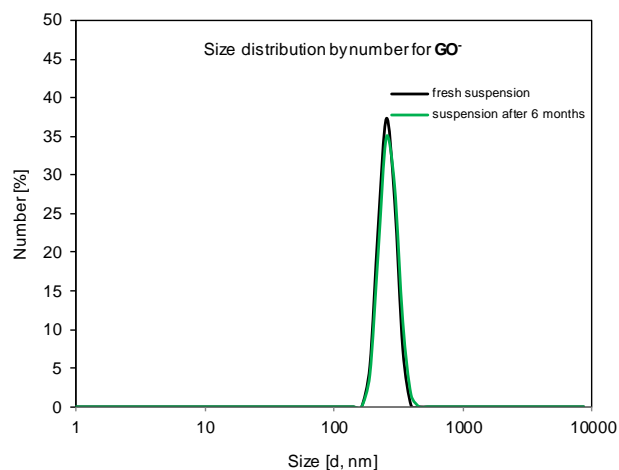

Figure S1. Size distribution measured by DLS for suspensions of  $\text{GO}^+$  - (A) and  $\text{GO}^-$  - (B), freshly prepared and after 6 months of storage.
